# Supplementary material for: Production and properties of adhesin-free gingipain proteinase RgpA
Source: PubMed Central journal article supplement (PMC10319874; doi:10.1038/s41598-023-37534-x), 2023-07-04
Supplement: 41598_2023_37534_MOESM1_ESM.pdf [file 41598_2023_37534_MOESM1_ESM.pdf]

## Production and properties of adhesin-free gingipain proteinase RgpA

Abu Sayeed M. Mahmud, Christine A. Seers, N. Laila Huq, Lianyi Zhang, Catherine A. Butler, Keith J. Cross, and Eric C. Reynolds\*.

### SUPPORTING INFORMATION

**S1 Table:** Oligonucleotides used in this study

**S2 Table:** List of peptides derived from the LCMS analysis of tryptic digested SDS-PAGE gel band (a) of ECR803 day 1 VFSN proteins presented in Fig. 2.

**S3 Table:** List of peptides derived from the LCMS analysis of tryptic digested SDS-PAGE gel band (b) of ECR803 day 1 VFSN proteins presented in Fig. 2.

**S4 Table:** List of peptides derived from the LCMS analysis of tryptic digested SDS-PAGE gel band (c) of ECR804 day 1 VFSN proteins presented in Fig. 2.

**S5 Table:** List of peptides derived from the LCMS analysis of tryptic digested SDS-PAGE gel band (e) of ECR805 day 1 VFSN proteins presented in Fig. 2.

**S6 Table:** List of peptides derived from the LCMS analysis of tryptic digested SDS-PAGE gel band (d) of ECR804 day 1 VFSN proteins presented in Fig. 2.

**S7 Table:** List of peptides derived from the LCMS analysis of tryptic digested SDS-PAGE gel band (f) of ECR805 day 1 VFSN proteins presented in Fig. 2.

**S8 Table:** List of peptides derived from the LCMS analysis of tryptic digested SDS-PAGE gel band (g) of ECR806 day 1 VFSN proteins presented in Fig. 2.

**S9 Table:** List of peptides derived from the LCMS analysis of tryptic digested SDS-PAGE gel band (h) of ECR806 day 1 VFSN proteins presented in Fig. 2.

**S10 Table:** Peptides derived from the LC-MS analysis of trypsin digested purified rRgpAH.

**S11 Table:** The  $K_i$  of rRgpA-PP, rRgpB-PP, and rKgp-PP against purified gingipains.

**S12 Table:** The  $K_i$  of rRgpA-PP and rRgpB-PP against rRgpAH.

**S1 Fig:** PCR analysis of transformed *P. gingivalis* genomic DNA

**S2 Fig:** LC-MS analysis of the rRgpA secreted by ECR806.

**S3 Fig:** The LC-MS analysis of trypsin digested peptides of rRgpATH in the ECR821 VFSN band j (Fig 2.).

**S4 Fig:** The LC-MS analysis of tryptic digested rRgpAH peptides.

**S5 Fig:** SDS-PAGE and MS analysis of purified rRgpAH.

**S6 Fig:** The kinetics of rKgp using substrate GPKNA.

**S7 Fig:** Original gel and blot images

**S1 Table:** Oligonucleotides used in this study

| <b>Name</b>        | <b>Sequence</b>                                                        | <b>Target DNA</b>                        | <b>Purpose</b>                                                                                 |
|--------------------|------------------------------------------------------------------------|------------------------------------------|------------------------------------------------------------------------------------------------|
| <b>RgpAhr3pR</b>   | ACAAAAATGGAGCTGTGCCG                                                   | 3' to <i>rgpA</i>                        | Genome integration verification, <i>rgpA</i> locus                                             |
| <b>pgmAR1</b>      | AAAAGGCAGGAGTTGTTTTGCGT                                                | 5' to <i>rgpA</i>                        | Genome integration verification, <i>rgpA</i> locus                                             |
| <b>R01</b>         | GCTGACCCGTAAAACGAACG                                                   | <i>ermF</i> at 5', reverse; pRgpArelease | Genome integration verification, <i>rgpA</i> locus, and SOE PCR to produce <i>rgpAH/rgpATH</i> |
| <b>F01</b>         | GTTTCGGTTCTGCAGTTGTCG                                                  | pRgpArelease                             | SOE PCR to produce <i>rgpAH/rgpATH</i>                                                         |
| <b>R02</b>         | ACCATGATGATGATGATGATGATG<br>ACCTGAGCCTCTAGGGACCAG<br>CGTGCTATTAGTGTGAT | pRgpArelease                             | SOE PCR to produce <i>rgpATH</i> .<br>Anneals TINTNS codons                                    |
| <b>F02</b>         | CTGGTCCCTAGAGGCTCAGGT<br>CATCATCATCATCATCATGGT<br>AAGAAGGCAAGCTATACC   | pRgpArelease                             | SOE PCR to produce <i>rgpATH</i>                                                               |
| <b>R03</b>         | ACCATGATGATGATGATGATGATG<br>ACCCGTGCTATTAGTGTGAT<br>GG                 | pRgpArelease                             | SOE PCR to produce <i>rgpAH</i> .<br>Anneals TINTNS codons                                     |
| <b>F03</b>         | GGTCATCATCATCATCATCAT<br>GGTAAGAAGGCAAGCTATAC<br>CTA                   | pRgpArelease                             | SOE PCR to produce <i>rgpAH</i>                                                                |
| <b>tetQ5prev</b>   | GGCATTGAGTATTTCCCATTC<br>G                                             | <i>tetQ</i>                              | Genome integration verification, <i>rgpB</i> locus                                             |
| <b>E72s-1F</b>     | CGAGGCAAGTCCGGATG                                                      | <i>rgpB</i>                              | Genome integration verification, <i>rgpB</i> locus                                             |
| <b>RgpA-PP-for</b> | ACGCAGCATATGCAGCAGAC<br>AGAGTTGGGACGCA                                 | <i>rgpA</i>                              | Production of rRgpA-PP                                                                         |
| <b>RgpA-PP-rev</b> | CTCTCTCTCGAGTTAACGCCCT<br>GGCTCGTAGTTCATG                              | <i>rgpA</i>                              | Production of rRgpA-PP                                                                         |

**S2 Table:** List of peptides derived from the LCMS analysis of tryptic digested SDS-PAGE gel band (a) of ECR803, D1, VFSN proteins presented in Fig. 2.

| Peptides                                                          | MaxQuant Score | Theoretical neutral monoisotopic mass | Mass Error (ppm) |
|-------------------------------------------------------------------|----------------|---------------------------------------|------------------|
| <sup>64</sup> GIGQVPTYTEGVNLSK <sup>80</sup>                      | 15             | 1790.9                                | 1.121            |
| <sup>99</sup> EMKVEVVSSK <sup>108</sup>                           | 74.9           | 1134.59                               | -0.172           |
| <sup>102</sup> VEVVSSKFIEKK <sup>113</sup>                        | 51.2           | 1391.8                                | 0.27             |
| <sup>109</sup> FIEKKNVLIAPSK <sup>113</sup>                       | 72             | 1485.89                               | 0.184            |
| <sup>114</sup> KNVLIAPSK <sup>121</sup>                           | 146            | 968.6                                 | -0.178           |
| <sup>115</sup> NVLIAPSK <sup>121</sup>                            | 54             | 840.5                                 | 0.075            |
| <sup>115</sup> NVLIAPSKGMIMR <sup>126</sup>                       | 86             | 1428.79                               | -0.109           |
| <sup>122</sup> GMIMRNEDPK <sup>131</sup>                          | 27.5           | 1189.55                               | 0.177            |
| <sup>132</sup> KIPYVYGK <sup>139</sup>                            | 62.8           | 966.55                                | 0.147            |
| <sup>133</sup> IPYVYGK <sup>139</sup>                             | 67             | 838.45                                | 0.028            |
| <sup>201</sup> NILNKK <sup>206</sup>                              | 54             | 728.45                                | 0.289            |
| <sup>206</sup> KGTFAGFEDTYK <sup>217</sup>                        | 153            | 1362.64                               | 0.0029           |
| <sup>207</sup> GTFAGFEDTYK <sup>217</sup>                         | 129.8          | 1234.55                               | 0.042            |
| <sup>207</sup> GTFAGFEDTYKR <sup>218</sup>                        | 155.5          | 1390.65                               | -0.297           |
| <sup>228</sup> YTPVEEK <sup>234</sup>                             | 28             | 864.4                                 | 0.062            |
| <sup>228</sup> YTPVEEKQNGR <sup>238</sup>                         | 76             | 1319.64                               | 0.042            |
| <sup>239</sup> MIVIVAK <sup>245</sup>                             | 106            | 772.48                                | 0.421            |
| <sup>239</sup> MIVIVAKK <sup>246</sup>                            | 98             | 900.58                                | 0.265            |
| <sup>269</sup> VAEDIASPV TANAIQQFVK <sup>287</sup>                | 38             | 2000.05                               | -1.270           |
| <sup>288</sup> QEYEKEGNDLTYVLLIGDHK <sup>307</sup>                | 124            | 2363.16                               | 0.105            |
| <sup>288</sup> QEYEKEGNDLTYVLLIGDHKDIPAK <sup>312</sup>           | 88.5           | 2887.46                               | -0.064           |
| <sup>293</sup> EGNDLTYVLLIGDHK <sup>307</sup>                     | 303            | 1685.86                               | -0.161           |
| <sup>293</sup> EGNDLTYVLLIGDHKDIPAK <sup>312</sup>                | 239            | 2210.15                               | -0.229           |
| <sup>308</sup> DIPAKITPGIK <sup>318</sup>                         | 80             | 1151.69                               | -0.065           |
| <sup>319</sup> SDQVYGQIVGNDHYNEVFIGR <sup>339</sup>               | 189.8          | 2409.13                               | 0.362            |
| <sup>340</sup> FSCSKEDLKTQIDR <sup>354</sup>                      | 175.3          | 1797.85                               | 0.134            |
| <sup>340</sup> FSCSKEDLK <sup>349</sup>                           | 63             | 1184.53                               | 0.226            |
| <sup>355</sup> TIHYERNITTEK <sup>367</sup>                        | 35.6           | 1618.79                               | -0.322           |
| <sup>409</sup> IIKCYDPGVTPK <sup>420</sup>                        | 78             | 1332.71                               | 0.149            |
| <sup>421</sup> NIIDAFNGGISLANYTGHGSETAWGTSHFGTTHVK <sup>455</sup> | 8              | 3659.73                               | -2.166           |
| <sup>490</sup> AQKDGKPTGTVAIIASTINQSWASPMR <sup>516</sup>         | 91.7           | 2827.46                               | 0.001            |
| <sup>517</sup> GQDEMNEILCEKHPNNIK <sup>536</sup>                  | 53.7           | 2110.97                               | 0.124            |
| <sup>517</sup> GQDEMNEILCEKHPNNIKR <sup>537</sup>                 | 91.5           | 2267.07                               | -0.251           |
| <sup>537</sup> RTFGGV TMNGMFAMVEK <sup>551</sup>                  | 106.8          | 1874.88                               | 0.137            |
| <sup>538</sup> TFGGV TMNGMFAMVEK <sup>551</sup>                   | 213            | 1718.78                               | -0.433           |
| <sup>552</sup> YKKDGEK <sup>558</sup>                             | 40             | 866.44                                | 0.761            |
| <sup>555</sup> DGEKMLDTWTVFGDPSLLVR <sup>574</sup>                | 107            | 2278.13                               | -0.432           |
| <sup>575</sup> TLVPTK <sup>580</sup>                              | 55             | 657.4                                 | -0.026           |
| <sup>649</sup> ETVIKTINTNSTK <sup>661</sup>                       | 113.5          | 1447.78                               | 0.087            |

**S3 Table:** List of peptides derived from the LCMS analysis of tryptic digested SDS-PAGE gel band (b) of ECR803, D3, VFSN proteins presented in Fig. 2.

| Peptides                                                              | MaxQuant Score | Theoretical neutral monoisotopic mass | Mass Error (ppm) |
|-----------------------------------------------------------------------|----------------|---------------------------------------|------------------|
| <sup>228</sup> YTPVEEK <sup>234</sup>                                 | 65.4           | 864.66                                | 0.249            |
| <sup>228</sup> YTPVEEKQNGR <sup>238</sup>                             | 74             | 1319.64                               | 0.035            |
| <sup>239</sup> MIVIVAK <sup>245</sup>                                 | 112            | 772.48                                | 0.143            |
| <sup>239</sup> MIVIVAKK <sup>246</sup>                                | 111.6          | 900.58                                | 0.265            |
| <sup>239</sup> MIVIVAKKYEGDIK <sup>252</sup>                          | 14             | 1605.9                                | 0.141            |
| <sup>239</sup> MIVIVAKKYEGDIKDFVDWK <sup>258</sup>                    | 38.5           | 2396.28                               | 0.100            |
| <sup>269</sup> VAEDIASPV TANAIQQFVK <sup>287</sup>                    | 39             | 2000.05                               | 0.013            |
| <sup>288</sup> QEYEKEGNDLTYVLLIGDHK <sup>307</sup>                    | 90.8           | 2363.16                               | 0.519            |
| <sup>288</sup> QEYEKEGNDLTYVLLIGDHKDIPAK <sup>312</sup>               | 73.6           | 2887.46                               | -0.303           |
| <sup>293</sup> EGNDLTYVLLIGDHKDIPAKITPGIK <sup>318</sup>              | 25             | 2819.54                               | -0.024           |
| <sup>293</sup> EGNDLTYVLLIGDHKDIPAK <sup>312</sup>                    | 183.2          | 2210.15                               | -0.447           |
| <sup>293</sup> EGNDLTYVLLIGDHK <sup>307</sup>                         | 242            | 1685.86                               | -0.407           |
| <sup>308</sup> DIPAKITPGIK <sup>318</sup>                             | 103.4          | 1151.69                               | 0.034            |
| <sup>319</sup> SDQVYQIVGNDHYNEVFIGR <sup>339</sup>                    | 181.5          | 2409.13                               | -0.416           |
| <sup>340</sup> FSCSKEDLK <sup>349</sup>                               | 172.6          | 1184.53                               | -0.142           |
| <sup>340</sup> FSCSKEDLKTQIDR <sup>354</sup>                          | 139.8          | 1797.85                               | -0.416           |
| <sup>350</sup> TQIDRTIHYER <sup>360</sup>                             | 94.8           | 1430.72                               | -0.154           |
| <sup>355</sup> TIHYER <sup>360</sup>                                  | 61             | 817.40                                | -0.325           |
| <sup>355</sup> TIHYERNITTEDK <sup>367</sup>                           | 75.8           | 1618.79                               | -0.035           |
| <sup>409</sup> IIKCYDPGVTPK420                                        | 95.4           | 1332.71                               | 0.0192           |
| <sup>421</sup> NIIDAFNGGISLANYTGHGSETAWGTSHFGTTHVK <sup>455</sup>     | 20             | 3659.73                               | -0.201           |
| <sup>490</sup> AQKD GKPTGTVAIIASTINQSWASPMR <sup>516</sup>            | 65             | 2827.46                               | -0.534           |
| <sup>517</sup> GQDEMNEILCEKHPNNIK <sup>536</sup>                      | 165.4          | 2110.97                               | 0.178            |
| <sup>517</sup> GQDEMNEILCEKHPNNIKR <sup>537</sup>                     | 60             | 2267.07                               | -0.551           |
| <sup>537</sup> RTFGGVTMNGMFAMVEK <sup>551</sup>                       | 182            | 1874.88                               | -2.48            |
| <sup>538</sup> TFGGVTMNGMFAMVEKYKK <sup>554</sup>                     | 46             | 2138.03                               | 0.107            |
| <sup>552</sup> YKKDGEK <sup>558</sup>                                 | 38.3           | 866.44                                | 0.116            |
| <sup>555</sup> DGEKMLDTWTVFGDPSLLVR <sup>574</sup>                    | 99             | 2278.13                               | -0.036           |
| <sup>575</sup> TLVPTK <sup>580</sup>                                  | 53             | 657.4                                 | 0.074            |
| <sup>615</sup> MFGSAVVENGTATINLTGLTNESTLTLTVVGYNKETVIK <sup>653</sup> | 74.5           | 4085.12                               | -2.496           |
| <sup>649</sup> ETVIKTINTNSTK <sup>661</sup>                           | 236.4          | 1447.78                               | 0.156            |

**S4 Table:** List of peptides derived from the LCMS analysis of tryptic digested SDS-PAGE gel band (c) from ECR804, D1, VFSN proteins as shown in Fig. 2.

| Peptides                                                             | MaxQuant Score | Theoretical neutral monoisotopic mass | Mass Error (ppm) |
|----------------------------------------------------------------------|----------------|---------------------------------------|------------------|
| <sup>56</sup> FTEVQTPK <sup>63</sup>                                 | 125            | 948.49                                | -0.049           |
| <sup>66</sup> GIGQVPTYTEGVNLSEK <sup>80</sup>                        | 89             | 1790.9                                | 0.310            |
| <sup>99</sup> EMKVEVSSK <sup>108</sup>                               | 153.54         | 1134.59                               | -0.236           |
| <sup>102</sup> VEVVSSKFIKK <sup>113</sup>                            | 127.56         | 1263.7                                | -0.590           |
| <sup>109</sup> FIEKKNVLIAPSK <sup>113</sup>                          | 31.7           | 1485.89                               | 0.116            |
| <sup>114</sup> KNVLIAPSK <sup>121</sup>                              | 123            | 968.6                                 | -0.052           |
| <sup>114</sup> KNVLIAPSKGMIMR <sup>126</sup>                         | 68             | 1556.88                               | -0.067           |
| <sup>115</sup> NVLIAPSK <sup>121</sup>                               | 73             | 840.5                                 | 0.122            |
| <sup>115</sup> NVLIAPSKGMIMR <sup>126</sup>                          | 117            | 1428.79                               | -0.230           |
| <sup>122</sup> GMIMRNEDPK <sup>131</sup>                             | 44.4           | 1189.55                               | -0.132           |
| <sup>132</sup> KIPVYVGK <sup>139</sup>                               | 84.7           | 966.55                                | 0.001            |
| <sup>133</sup> IPVYVGK <sup>139</sup>                                | 96             | 838.45                                | 0.043            |
| <sup>143</sup> FFPGEIATLDDPFILRDVR <sup>161</sup>                    | 63             | 2220.15                               | 2.114            |
| <sup>162</sup> GQVVNFAPLQYNPVTKTLR <sup>180</sup>                    | 131.3          | 2144.17                               | -0.101           |
| <sup>201</sup> NILNKKGTAFAGFEDTYKR <sup>218</sup>                    | 38             | 2101.09                               | 0.256            |
| <sup>206</sup> KGTFAGFEDTYK <sup>217</sup>                           | 110.3          | 1362.64                               | -0.152           |
| <sup>207</sup> GTFAGFEDTYK <sup>217</sup>                            | 138.3          | 1234.6                                | 0.204            |
| <sup>207</sup> GTFAGFEDTYKR <sup>218</sup>                           | 174            | 1390.65                               | 0.045            |
| <sup>228</sup> YTPVEEK <sup>234</sup>                                | 37             | 864.4                                 | 0.003            |
| <sup>228</sup> YTPVEEKQNGR <sup>238</sup>                            | 55             | 1319.6                                | 0.083            |
| <sup>239</sup> MIVIVAK <sup>245</sup>                                | 77.4           | 772.48                                | 0.120            |
| <sup>239</sup> MIVIVAKK <sup>246</sup>                               | 99.4           | 900.58                                | 0.138            |
| <sup>288</sup> QEYEKEGNDLTYVLLIGDHK <sup>307</sup>                   | 107.6          | 2363.16                               | 0.079            |
| <sup>288</sup> QEYEKEGNDLTYVLLIGDHKDIPAK <sup>312</sup>              | 45             | 2887.46                               | -0.171           |
| <sup>293</sup> EGNDLTYVLLIGDHK <sup>307</sup>                        | 201            | 1685.86                               | -0.019           |
| <sup>293</sup> EGNDLTYVLLIGDHKDIPAK <sup>312</sup>                   | 257            | 2210.15                               | -0.120           |
| <sup>308</sup> DIPAKITPGIK <sup>318</sup>                            | 83             | 1151.69                               | 0.037            |
| <sup>319</sup> SDQVYGGQIVGNDHYNEVFIGR <sup>339</sup>                 | 131.5          | 2409.13                               | -0.169           |
| <sup>340</sup> FSCSKEDLK <sup>349</sup>                              | 77             | 1184.53                               | 0.004            |
| <sup>340</sup> FSCSKEDLKTQIDR <sup>354</sup>                         | 24.2           | 1797.85                               | -0.376           |
| <sup>355</sup> TIHYERNITTEDK <sup>367</sup>                          | 47             | 1618.79                               | -0.301           |
| <sup>409</sup> IICYDPGVTPK <sup>420</sup>                            | 67             | 1332.71                               | 0.020            |
| <sup>490</sup> AQKDGKPTGTVAIIASTINQSWASPMR <sup>516</sup>            | 103.4          | 2827.46                               | -0.204           |
| <sup>517</sup> GQDEMNEILCEKHPNNIKR <sup>537</sup>                    | 33             | 2267.07                               | 0.172            |
| <sup>538</sup> TFGGVTMNGMFAMVEK <sup>551</sup>                       | 105            | 1718.78                               | -0.644           |
| <sup>552</sup> YKKDGEK <sup>558</sup>                                | 69.2           | 866.44                                | 0.314            |
| <sup>575</sup> TLVPTK <sup>580</sup>                                 | 53             | 657.4                                 | 0.188            |
| <sup>615</sup> MFGSAVVENGATINLTGLTNESTLTLTVVGYNKETVIK <sup>653</sup> | 28.3           | 4085.1                                | -1.460           |
| <sup>649</sup> ETVIKTINTNSTK <sup>661</sup>                          | 188            | 1447.8                                | 0.055            |

**S5 Table:** List of peptides derived from the LCMS analysis of tryptic digested SDS-PAGE gel band (e) from ECR805, D1, VFSN proteins as shown in Fig. 2.

| Peptides                                                             | MaxQuant Score | Theoretical neutral monoisotopic mass | Mass Error (ppm) |
|----------------------------------------------------------------------|----------------|---------------------------------------|------------------|
| <sup>56</sup> FTEVQTPK <sup>63</sup>                                 | 107            | 948.49                                | -0.075           |
| <sup>66</sup> GIGQVPTYTEGVNLSEK <sup>80</sup>                        | 47.8           | 1790.9                                | 0.572            |
| <sup>99</sup> EMKVEVSSK <sup>108</sup>                               | 64             | 1134.59                               | 0.026            |
| <sup>99</sup> EMKVEVSSKFIEKK <sup>113</sup>                          | 45.3           | 1651.88                               | -0.10            |
| <sup>109</sup> FIEKKNVLIAPSK <sup>113</sup>                          | 57             | 1485.89                               | 0.06             |
| <sup>114</sup> KNVLIAPSK <sup>121</sup>                              | 157.8          | 968.6                                 | -0.139           |
| <sup>115</sup> NVLIAPSK <sup>121</sup>                               | 60             | 840.5                                 | -0.061           |
| <sup>132</sup> KIPYVYGK <sup>139</sup>                               | 81             | 966.55                                | -0.120           |
| <sup>206</sup> KGTFAGFEDTYK <sup>217</sup>                           | 157.5          | 1362.6                                | -0.181           |
| <sup>207</sup> GTFAGFEDTYK <sup>217</sup>                            | 74.6           | 1234.6                                | -0.094           |
| <sup>207</sup> GTFAGFEDTYKR <sup>218</sup>                           | 75             | 1390.65                               | -0.222           |
| <sup>228</sup> YTPVEEK <sup>234</sup>                                | 36.7           | 864.4                                 | 0.274            |
| <sup>288</sup> QEYEKEGNDLTYVLLIGDHK <sup>307</sup>                   | 58.7           | 2363.16                               | -0.063           |
| <sup>288</sup> QEYEKEGNDLTYVLLIGDHKDIPAK <sup>312</sup>              | 57             | 2887.46                               | 0.149            |
| <sup>293</sup> EGNDLTYVLLIGDHK <sup>307</sup>                        | 225.6          | 1685.86                               | 0.117            |
| <sup>293</sup> EGNDLTYVLLIGDHKDIPAK <sup>312</sup>                   | 39             | 2210.15                               | -0.325           |
| <sup>308</sup> DIPAKITPGIK <sup>318</sup>                            | 42.4           | 1151.69                               | -0.116           |
| <sup>319</sup> SDQVYQQIVGNDHYNEVFIGR <sup>339</sup>                  | 110.6          | 2409.13                               | -0.282           |
| <sup>340</sup> FSCSKEDLK <sup>349</sup>                              | 64             | 1184.53                               | -0.187           |
| <sup>421</sup> NIIDAFNGGISLANYTGHGSETAWGTSHFHTTHVK <sup>455</sup>    | 74.5           | 3659.73                               | -2.93            |
| <sup>490</sup> AQKDGKPTGTVAIIASTINQSWASPMR <sup>516</sup>            | 24             | 2827.46                               | -0.333           |
| <sup>538</sup> TFGGVTMNGMFAMVEK <sup>551</sup>                       | 231            | 1718.78                               | -0.390           |
| <sup>575</sup> TLVPTK <sup>580</sup>                                 | 65.9           | 657.4                                 | 0.044            |
| <sup>615</sup> MFGSAVVENGATINLTGLTNESTLTLTVVGYNKETVIK <sup>653</sup> | 42.3           | 4085.1                                | -1.672           |
| <sup>649</sup> ETVIKTINTNSTK <sup>661</sup>                          | 134            | 1447.78                               | -0.012           |

**S6 Table:** List of peptides derived from the LCMS analysis of tryptic digested SDS-PAGE gel band (d) from ECR804, D3, VFSN proteins as shown in Fig. 2.

| Peptides                                                  | MaxQuant Score | Theoretical neutral monoisotopic mass | Mass Error (ppm) |
|-----------------------------------------------------------|----------------|---------------------------------------|------------------|
| <sup>228</sup> YTPVEEK <sup>234</sup>                     | 49             | 864.4                                 | 0.120            |
| <sup>228</sup> YTPVEEKQNGR <sup>238</sup>                 | 49             | 1319.6                                | 0.086            |
| <sup>239</sup> MIVIVAK <sup>245</sup>                     | 103.3          | 772.48                                | 0.133            |
| <sup>239</sup> MIVIVAKK <sup>246</sup>                    | 66             | 900.58                                | 0.163            |
| <sup>239</sup> MIVIVAKKYEGDIK <sup>252</sup>              | 42             | 1605.9                                | -0.436           |
| <sup>239</sup> MIVIVAKKYEGDIKDFVDWK <sup>258</sup>        | 28             | 2396.28                               | 0.138            |
| <sup>288</sup> QEYEKEGNDLTYVLLIGDHK <sup>307</sup>        | 157.7          | 2363.16                               | 0.292            |
| <sup>288</sup> QEYEKEGNDLTYVLLIGDHKDIPAK <sup>312</sup>   | 50             | 2887.46                               | -0.029           |
| <sup>293</sup> EGNDLTYVLLIGDHK <sup>307</sup>             | 277            | 1685.86                               | -0.271           |
| <sup>293</sup> EGNDLTYVLLIGDHKDIPAK <sup>312</sup>        | 171.4          | 2210.15                               | -0.216           |
| <sup>293</sup> EGNDLTYVLLIGDHKDIPAKITPGIK <sup>318</sup>  | 72             | 2819.54                               | 0.123            |
| <sup>308</sup> DIPAKITPGIK <sup>318</sup>                 | 89.3           | 1151.69                               | -0.158           |
| <sup>319</sup> SDQVYGQIVGNDHYNEVFIGR <sup>339</sup>       | 196.8          | 2409.13                               | -0.134           |
| <sup>340</sup> FSCESKEDLK <sup>349</sup>                  | 161            | 1184.53                               | 0.034            |
| <sup>340</sup> FSCESKEDLKTQIDR <sup>354</sup>             | 136.6          | 1797.85                               | -0.142           |
| <sup>355</sup> TIHYER <sup>360</sup>                      | 72.2           | 817.4                                 | -0.233           |
| <sup>355</sup> TIHYERNITTEDK <sup>367</sup>               | 45.3           | 1618.79                               | 0.066            |
| <sup>409</sup> IIKCYDPGVTPK <sup>420</sup>                | 86             | 1332.71                               | 0.001            |
| <sup>490</sup> AQKDGKPTGTVAIIASTINQSWASPMR <sup>516</sup> | 97.8           | 2827.46                               | -0.547           |
| <sup>517</sup> GQDEMNEILCEKHPNNIK <sup>536</sup>          | 41             | 2110.97                               | -0.116           |
| <sup>517</sup> GQDEMNEILCEKHPNNIKR <sup>537</sup>         | 64.5           | 2267.07                               | -0.197           |
| <sup>537</sup> RTFGGVTMNGMFAMVEK <sup>551</sup>           | 104.6          | 1874.88                               | 0.453            |
| <sup>538</sup> TFGGVTMNGMFAMVEK <sup>551</sup>            | 223            | 1718.78                               | -1.490           |
| <sup>538</sup> TFGGVTMNGMFAMVEKYKK <sup>554</sup>         | 48.4           | 2138.03                               | 0.567            |
| <sup>552</sup> YKKDGEK <sup>558</sup>                     | 55.3           | 866.44                                | 0.261            |
| <sup>555</sup> DGEKMLDTWTVFGDPSLLVR <sup>574</sup>        | 99.7           | 2278.13                               | -0.102           |
| <sup>575</sup> TLVPTK <sup>580</sup>                      | 63.6           | 657.4                                 | 0.001            |
| <sup>649</sup> ETVIKTINTNSTK <sup>661</sup>               | 153.3          | 1447.78                               | 0.182            |

**S7 Table:** List of peptides derived from the LCMS analysis of tryptic digested SDS-PAGE gel band (f) from ECR805, D3, VFSN proteins as shown in Fig. 2.

| Peptides                                                          | MaxQuant Score | Theoretical neutral monoisotopic mass | Mass Error (ppm) |
|-------------------------------------------------------------------|----------------|---------------------------------------|------------------|
| <sup>228</sup> YTPVEEK <sup>234</sup>                             | 39             | 864.4                                 | 0.104            |
| <sup>228</sup> YTPVEEKQNGR <sup>238</sup>                         | 153            | 1319.6                                | -0.317           |
| <sup>239</sup> MIVIVAK <sup>245</sup>                             | 97.6           | 772.48                                | 0.097            |
| <sup>239</sup> MIVIVAKK <sup>246</sup>                            | 128.6          | 900.58                                | -0.044           |
| <sup>228</sup> YTPVEEKQNGRMIVIVAK <sup>245</sup>                  | 40             | 2074.12                               | -0.160           |
| <sup>239</sup> MIVIVAKKYEGDIKDFVDWK <sup>258</sup>                | 34             | 2396.28                               | 0.214            |
| <sup>265</sup> TEVKVAEDIASPV TANAIQQFVKQEYK <sup>292</sup>        | 150            | 3134.6                                | 0.017            |
| <sup>269</sup> VAEDIASPV TANAIQQFVK <sup>287</sup>                | 176            | 2000.05                               | 0.013            |
| <sup>288</sup> QEYEKEGNDLTYVLLIGDHK <sup>307</sup>                | 56             | 2363.16                               | 0.291            |
| <sup>288</sup> QEYEKEGNDLTYVLLIGDHKDIPAK <sup>312</sup>           | 83             | 2887.46                               | 0.091            |
| <sup>293</sup> EGNDLTYVLLIGDHK <sup>307</sup>                     | 86.7           | 1685.86                               | 0.009            |
| <sup>293</sup> EGNDLTYVLLIGDHKDIPAK <sup>312</sup>                | 195.3          | 2210.15                               | 0.698            |
| <sup>293</sup> EGNDLTYVLLIGDHKDIPAKITPGIK <sup>318</sup>          | 17             | 2819.54                               | 0.430            |
| <sup>308</sup> DIPAKITPGIK <sup>318</sup>                         | 71.2           | 1151.69                               | 0.034            |
| <sup>308</sup> DIPAKITPGIKSDQVYGQIVGNDHYNEVFIGR <sup>339</sup>    | 45             | 3542.8                                | 0.001            |
| <sup>319</sup> SDQVYGQIVGNDHYNEVFIGR <sup>339</sup>               | 196.8          | 2409.13                               | -0.323           |
| <sup>319</sup> SDQVYGQIVGNDHYNEVFIGRFSCEKEDLKTQIDR <sup>354</sup> | 54             | 4188.98                               | 0.149            |
| <sup>340</sup> FSCESKEDLK <sup>349</sup>                          | 169.3          | 1184.53                               | -0.183           |
| <sup>340</sup> FSCESKEDLKTQIDR <sup>354</sup>                     | 231.6          | 1797.85                               | 0.0258           |
| <sup>340</sup> FSCESKEDLKTQIDRTIHYER <sup>360</sup>               | 40             | 2597.25                               | -0.513           |
| <sup>346</sup> EDLKTQIDRTIHYER <sup>360</sup>                     | 78             | 1915.97                               | -0.037           |
| <sup>350</sup> TQIDRTIHYER <sup>360</sup>                         | 99.3           | 1430.72                               | -0.158           |
| <sup>355</sup> TIHYER <sup>360</sup>                              | 50             | 817.4                                 | 0.264            |
| <sup>409</sup> IICYDPGVTPK <sup>420</sup>                         | 127.2          | 1332.71                               | -0.025           |
| <sup>421</sup> NIIDAFNGGISLANYTGHGSETAWGTSHFGTTHVK <sup>455</sup> | 17             | 3659.73                               | -1.910           |
| <sup>490</sup> AQKDGKPTGTVAIIASTINQSWASPMR <sup>516</sup>         | 112.8          | 2827.46                               | -0.392           |
| <sup>517</sup> GQDEMNEILCEKHPNNIK <sup>536</sup>                  | 47             | 2110.97                               | -0.214           |
| <sup>517</sup> GQDEMNEILCEKHPNNIKR <sup>537</sup>                 | 98             | 2267.07                               | -0.167           |
| <sup>537</sup> RTFGGVTMNGMFAMVEK <sup>551</sup>                   | 134            | 1874.88                               | -0.260           |
| <sup>538</sup> TFGGVTMNGMFAMVEK <sup>551</sup>                    | 292            | 1718.78                               | -0.132           |
| <sup>538</sup> TFGGVTMNGMFAMVEKYK <sup>553</sup>                  | 85.5           | 2009.94                               | -1.117           |
| <sup>538</sup> TFGGVTMNGMFAMVEKYKK <sup>554</sup>                 | 55             | 2138.03                               | -0.203           |
| <sup>552</sup> YKKDGEK <sup>558</sup>                             | 77.3           | 866.44                                | 0.192            |
| <sup>552</sup> YKKDGEKMLDTWTVFGDPSLLVR <sup>574</sup>             | 85.7           | 2697.38                               | -0.310           |
| <sup>554</sup> KDGEKMLDTWTVFGDPSLLVR <sup>574</sup>               | 65.4           | 2406.2                                | -0.890           |
| <sup>555</sup> DGEKMLDTWTVFGDPSLLVR <sup>574</sup>                | 158            | 2278.13                               | -0.310           |
| <sup>575</sup> TLVPTK <sup>580</sup>                              | 56.7           | 657.4                                 | -3.820           |
| <sup>649</sup> ETVIKTINTNSTK <sup>661</sup>                       | 228.4          | 1447.78                               | 0.053            |



**S8 Table:** List of peptides derived from the LCMS analysis of tryptic digested SDS-PAGE gel band (g) from ECR806, D1, VFSN proteins as shown in Fig. 2.

| Peptides                                                         | MaxQuant Score | Theoretical neutral monoisotopic mass | Mass Error (ppm) |
|------------------------------------------------------------------|----------------|---------------------------------------|------------------|
| <sup>56</sup> FTEVQTPK <sup>63</sup>                             | 153            | 948.49                                | 0.064            |
| <sup>56</sup> FTEVQTPKGIGQVPTYTEGVNLSK <sup>80</sup>             | 91.8           | 2721.38                               | 0.178            |
| <sup>66</sup> GIGQVPTYTEGVNLSK <sup>80</sup>                     | 148.3          | 1790.9                                | -0.032           |
| <sup>99</sup> EMKVEVVSSK <sup>108</sup>                          | 153.64         | 1134.59                               | -0.144           |
| <sup>102</sup> VEVVSSKFIEK <sup>112</sup>                        | 90             | 1263.7                                | -0.22            |
| <sup>102</sup> VEVVSSKFIEKK <sup>113</sup>                       | 31             | 1391.8                                | -0.075           |
| <sup>109</sup> FIEKKNVLIAPSK <sup>113</sup>                      | 67             | 1485.89                               | 0.153            |
| <sup>114</sup> KNVLIAPSK <sup>121</sup>                          | 158            | 968.6                                 | -0.057           |
| <sup>115</sup> NVLIAPSK <sup>121</sup>                           | 56.4           | 840.5                                 | 0.281            |
| <sup>115</sup> NVLIAPSKGMIMR <sup>126</sup>                      | 53             | 1428.79                               | -0.143           |
| <sup>122</sup> GMIMRNEDPK <sup>131</sup>                         | 16             | 1189.55                               | 0.133            |
| <sup>132</sup> KIPVYVGK <sup>139</sup>                           | 109            | 966.55                                | 0.229            |
| <sup>132</sup> KIPVYVGKTYSQNK <sup>145</sup>                     | 58.8           | 1687.89                               | -0.254           |
| <sup>133</sup> IPVYVGK <sup>140</sup>                            | 75             | 438.45                                | -0.015           |
| <sup>201</sup> NILNKK <sup>206</sup>                             | 60.4           | 728.45                                | 0.539            |
| <sup>201</sup> NILNKKGTFAGFEDTYK <sup>218</sup>                  | 14             | 2101.09                               | -1.47            |
| <sup>206</sup> KGTFAGFEDTYK <sup>217</sup>                       | 153.3          | 1362.6                                | -0.106           |
| <sup>207</sup> GTFAGFEDTYK <sup>217</sup>                        | 113            | 1234.6                                | -0.195           |
| <sup>207</sup> GTFAGFEDTYKR <sup>218</sup>                       | 216            | 1390.65                               | -0.344           |
| <sup>228</sup> YTPVEEK <sup>234</sup>                            | 23             | 864.4                                 | 0.130            |
| <sup>228</sup> YTPVEEKQNGR <sup>238</sup>                        | 31             | 1319.6                                | -0.177           |
| <sup>239</sup> MIVIVAK <sup>245</sup>                            | 92.7           | 772.48                                | 0.215            |
| <sup>246</sup> KYEGDIKDFVDWK <sup>258</sup>                      | 234            | 1641.8                                | -0.399           |
| <sup>253</sup> DFVDWK <sup>258</sup>                             | 95.8           | 808.37                                | -0.382           |
| <sup>269</sup> VAEDIASPVATANAIQQFVK <sup>287</sup>               | 243.4          | 2000.05                               | 0.385            |
| <sup>269</sup> VAEDIASPVATANAIQQFVKQEYK <sup>292</sup>           | 42             | 2677.35                               | -1.062           |
| <sup>288</sup> QEYEKEGNDLTYVLLIGDHK <sup>307</sup>               | 69.4           | 2363.16                               | 0.504            |
| <sup>288</sup> QEYEKEGNDLTYVLLIGDHKDIPAK <sup>312</sup>          | 36.2           | 2887.46                               | -0.372           |
| <sup>293</sup> EGNDLTYVLLIGDHK <sup>307</sup>                    | 241            | 1685.86                               | 0.0124           |
| <sup>293</sup> EGNDLTYVLLIGDHKDIPAK <sup>312</sup>               | 69.5           | 2210.15                               | -0.747           |
| <sup>308</sup> DIPAKITPGIK <sup>318</sup>                        | 77.6           | 1151.69                               | 0.286            |
| <sup>319</sup> SDQVYGVQVGNHYNEVFIGR <sup>339</sup>               | 75.6           | 2409.13                               | -0.097           |
| <sup>340</sup> FSCSKEDLKTQIDR <sup>354</sup>                     | 31             | 1797.85                               | -0.057           |
| <sup>412</sup> CYDPGVTPK <sup>420</sup>                          | 66.3           | 978.44                                | -0.063           |
| <sup>421</sup> NIIDAFNGGISLANYTHGSETAWGTSHFGTTHVK <sup>455</sup> | 97.4           | 3659.73                               | -3.570           |
| <sup>490</sup> AQKDGKPTGTVAIHASTINQSWASPMR <sup>516</sup>        | 81.7           | 2827.46                               | -0.274           |
| <sup>538</sup> TFGGVTMNGMFAMVEK <sup>551</sup>                   | 214            | 1718.78                               | -0.638           |
| <sup>552</sup> YKKDGEK <sup>558</sup>                            | 67.5           | 866.44                                | 0.575            |
| <sup>552</sup> YKKDGEKMLDTWTVFGDPSLLVR <sup>574</sup>            | 51             | 2697.38                               | 0.100            |
| <sup>575</sup> TLVPTK <sup>580</sup>                             | 38.6           | 657.4                                 | 0.126            |
| <sup>649</sup> ETVIKTINTNSTK <sup>661</sup>                      | 177.8          | 1447.78                               | -0.435           |
| <sup>662</sup> KASYTYTVYRDGTK <sup>675</sup>                     | 37.6           | 1651.8                                | -2.282           |
| <sup>663</sup> ASYTYTVYRDGTK <sup>675</sup>                      | 133            | 1523.72                               | -0.034           |
| <sup>703</sup> YTAGVSPK <sup>710</sup>                           | 64.8           | 821.42                                | 0.091            |

**S9 Table:** List of peptides derived from the LCMS analysis of tryptic digested SDS-PAGE gel band (h) from ECR806, D3, VFSN proteins as shown in Fig. 2.

| Peptides                                                          | MaxQuant Score | Theoretical neutral monoisotopic mass | Mass Error (ppm) |
|-------------------------------------------------------------------|----------------|---------------------------------------|------------------|
| <sup>56</sup> FTEVQTPK <sup>63</sup>                              | 138            | 948.49                                | 0.219            |
| <sup>66</sup> GIGQVPTYTEGVNLSEK <sup>80</sup>                     | 123.4          | 1790.9                                | 0.004            |
| <sup>99</sup> EMKVEVVSSK <sup>108</sup>                           | 114.8          | 1134.59                               | 1.228            |
| <sup>114</sup> KNVLIAPSK <sup>121</sup>                           | 105.4          | 968.6                                 | 0.106            |
| <sup>132</sup> KIPVYVGK <sup>139</sup>                            | 102.8          | 966.55                                | -0.116           |
| <sup>207</sup> GTFAGFEDTYKR <sup>218</sup>                        | 133            | 1390.65                               | -0.154           |
| <sup>228</sup> YTPVEEK <sup>234</sup>                             | 45.7           | 864.4                                 | 0.076            |
| <sup>228</sup> YTPVEEKQNGR <sup>238</sup>                         | 71             | 1319.6                                | 0.025            |
| <sup>239</sup> MIVIVAK <sup>245</sup>                             | 90             | 772.48                                | 0.457            |
| <sup>239</sup> MIVIVAKK <sup>246</sup>                            | 99.4           | 900.58                                | -0.070           |
| <sup>246</sup> KYEGDIKDFVDWK <sup>258</sup>                       | 212            | 1641.80                               | -0.079           |
| <sup>246</sup> KYEGDIKDFVDWK <sup>261</sup>                       | 99.4           | 2040.00                               | -0.312           |
| <sup>247</sup> YEGDIKDFVDWK <sup>258</sup>                        | 156            | 1513.70                               | 0.181            |
| <sup>253</sup> DFVDWK <sup>258</sup>                              | 92.7           | 808.37                                | -0.094           |
| <sup>265</sup> TEVKVAEDIASPVTANAIQQFVKQEYK <sup>292</sup>         | 201            | 3134.6                                | -0.100           |
| <sup>269</sup> VAEDIASPVTANAIQQFVK <sup>287</sup>                 | 311            | 2000.05                               | -0.031           |
| <sup>269</sup> VAEDIASPVTANAIQQFVKQEYK <sup>292</sup>             | 182            | 2677.35                               | -0.341           |
| <sup>288</sup> QEYEKEGNDLTYVLLIGDHK <sup>307</sup>                | 56.7           | 2363.16                               | 1.152            |
| <sup>288</sup> QEYEKEGNDLTYVLLIGDHKDIPAK <sup>312</sup>           | 62.7           | 2887.46                               | 0.493            |
| <sup>293</sup> EGNDLTYVLLIGDHK <sup>307</sup>                     | 236            | 1685.86                               | 0.088            |
| <sup>293</sup> EGNDLTYVLLIGDHKDIPAK <sup>312</sup>                | 179.8          | 2210.15                               | -0.042           |
| <sup>293</sup> EGNDLTYVLLIGDHKDIPAKITPGIK <sup>318</sup>          | 11.2           | 2819.54                               | 0.415            |
| <sup>308</sup> DIPAKITPGIK <sup>318</sup>                         | 84.2           | 1151.69                               | 0.285            |
| <sup>319</sup> SDQVYGQIVGNHDHYNEVFIGR <sup>339</sup>              | 207.5          | 2409.13                               | -0.131           |
| <sup>340</sup> FSCSKEDLK <sup>349</sup>                           | 90             | 1184.53                               | -0.030           |
| <sup>340</sup> FSCSKEDLKTQIDR <sup>354</sup>                      | 249.4          | 1797.85                               | 0.145            |
| <sup>386</sup> IIKCYDPGVTPK <sup>397</sup>                        | 69.4           | 1332.71                               | 0.374            |
| <sup>412</sup> CYDPGVTPK <sup>420</sup>                           | 60             | 978.44                                | 0.217            |
| <sup>421</sup> NIIDAFNGGISLANYTGHGSETAWGTSHFGTTHVK <sup>455</sup> | 86.4           | 3659.73                               | -1.819           |
| <sup>490</sup> AQKDGKPTGTVAIIASTINQSWASPMR <sup>516</sup>         | 115.8          | 2827.46                               | -0.405           |
| <sup>517</sup> GQDEMNEILCEKHPNNIK <sup>536</sup>                  | 49             | 2110.97                               | 0.0484           |
| <sup>517</sup> GQDEMNEILCEKHPNNIKR <sup>537</sup>                 | 86             | 2267.07                               | -0.244           |
| <sup>535</sup> RTFGGVTMNGMFAMVEK <sup>551</sup>                   | 146            | 1874.88                               | 0.203            |
| <sup>538</sup> TFGGVTMNGMFAMVEK <sup>551</sup>                    | 207            | 1718.78                               | 0.001            |
| <sup>552</sup> YKKDGEK <sup>558</sup>                             | 58.8           | 866.44                                | 0.460            |
| <sup>555</sup> DGEKMLDTWTVFGDPSLLVR <sup>574</sup>                | 90.8           | 2278.13                               | 0.133            |
| <sup>575</sup> TLVPTK <sup>580</sup>                              | 52.5           | 657.4                                 | 0.047            |
| <sup>649</sup> ETVIKTINTNSTK <sup>661</sup>                       | 151.7          | 1447.78                               | 0.282            |

**S10 Table:** Peptides derived from the LC-MS analysis of trypsin digested purified rRgpAH.

| Peptides                                                                | MaxQuant Score | Theoretical neutral monoisotopic mass | Mass error (ppm) |
|-------------------------------------------------------------------------|----------------|---------------------------------------|------------------|
| <sup>228</sup> YTPVEEK <sup>234</sup>                                   | 35             | 864.42                                | 0.078            |
| <sup>228</sup> YTPVEEKQNGR <sup>238</sup>                               | 129.7          | 1319.64                               | -0.120           |
| <sup>239</sup> MIVIVAKK <sup>246</sup>                                  | 130.7          | 900.58                                | -0.020           |
| <sup>243</sup> TEVKYEGDIKDFVDWNQR <sup>260</sup>                        | 144            | 2457.31                               | 0.057            |
| <sup>246</sup> KYEGDIKDFVDWK <sup>258</sup>                             | 267            | 1641.80                               | 0.113            |
| <sup>247</sup> YEGDIKDFVDW <sup>257</sup>                               | 153.8          | 1513.70                               | 0.292            |
| <sup>247</sup> YEGDIKDFVDWNQR <sup>260</sup>                            | 253            | 1911.91                               | 0.036            |
| <sup>269</sup> VAEDIASPV TANAIQQFVK <sup>287</sup>                      | 273.8          | 2000.05                               | 0.055            |
| <sup>288</sup> QEYEKEGNDLTYVLLIGDHK <sup>307</sup>                      | 138            | 2363.16                               | 0.260            |
| <sup>288</sup> QEYEKEGNDLTYVLLIGDHKDIPAK <sup>312</sup>                 | 66.5           | 2887.46                               | -0.057           |
| <sup>293</sup> EGNDLTYVLLIGDHKDIPAK <sup>312</sup>                      | 276            | 2210.15                               | -0.036           |
| <sup>308</sup> DIPAKITPGIK <sup>318</sup>                               | 79             | 1151.69                               | 0.228            |
| <sup>313</sup> ITPGIKSDQVYGQIVGNDHYNEVFIGR <sup>339</sup>               | 86             | 3018.51                               | -0.040           |
| <sup>319</sup> SDQVYGQIVGNDHYNEVFIGR <sup>339</sup>                     | 219.6          | 2409.13                               | -0.079           |
| <sup>340</sup> FSCESKEDLKTQIDR <sup>354</sup>                           | 220.7          | 1797.85                               | 0.113            |
| <sup>346</sup> EDLKTQIDR <sup>354</sup>                                 | 145.5          | 1116.57                               | -0.080           |
| <sup>350</sup> TQIDRTIHYER <sup>360</sup>                               | 81.5           | 1430.72                               | 0.168            |
| <sup>368</sup> WLGQALCIASAEGGPSADNGESDIQHENVIANLLTQYGYTK <sup>408</sup> | 5              | 4333.05                               | 2.437            |
| <sup>409</sup> IIKCYDPGVTPK <sup>420</sup>                              | 120.6          | 1332.71                               | 0.148            |
| <sup>412</sup> CYDPGVTPK <sup>420</sup>                                 | 76             | 978.44                                | 0.191            |
| <sup>421</sup> NIIDAFNGGISLANYTGHGSETAWGTSHFGTTHVK <sup>455</sup>       | 73             | 3659.73                               | -1.581           |
| <sup>490</sup> AQKDGKPTGTVAIIASTINQSWASPMR <sup>516</sup>               | 111.3          | 2843.45                               | -0.562           |
| <sup>487</sup> DGKPTGTVAIIASTINQSWASPMR <sup>516</sup>                  | 153            | 2500.27                               | -0.211           |
| <sup>517</sup> GQDEMNEILCEK <sup>528</sup>                              | 217            | 1407.6                                | -0.244           |
| <sup>517</sup> GQDEMNEILCEKHPNNIK <sup>536</sup>                        | 122.5          | 2110.97                               | -0.002           |
| <sup>537</sup> RTFGGVTMNGMFAMVEK <sup>551</sup>                         | 162            | 1874.88                               | -0.691           |
| <sup>538</sup> TFGGVTMNGMFAMVEK <sup>551</sup>                          | 231            | 1766.76                               | -0.475           |
| <sup>538</sup> TFGGVTMNGMFAMVEKYKK <sup>554</sup>                       | 59             | 2138.03                               | 0.114            |
| <sup>555</sup> DGEKMLDTWTVFGDPSLLVR <sup>574</sup>                      | 39             | 2294.12                               | -0.098           |
| <sup>559</sup> MLDTWTVFGDPSLLVR <sup>574</sup>                          | 202            | 1864.93                               | -0.291           |
| <sup>581</sup> MQVTAPAQINLT DASVNVSCDYNGAIATISANGK <sup>614</sup>       | 27             | 3436.66                               | -1.919           |
| <sup>615</sup> MFGSAVVENGTATINLTGLTNESTLTLTVVGYNKETVIK <sup>653</sup>   | 88.3           | 4085.12                               | -2.317           |
| <sup>654</sup> TINTNSTGHHHHHGGK <sup>669</sup>                          | 127            | 1813.84                               | 0.109            |

**S11 Table:** The  $K_i$  of rRgpA-PP, rRgpB-PP, and rKgp-PP against purified gingipains.

| <b>Propeptide</b> | <b>rRgpAH (2.5 nM)</b>      | <b>RgpB (2.5 nM)</b>        | <b>rKgp (10 nM)</b>               |
|-------------------|-----------------------------|-----------------------------|-----------------------------------|
| rRgpA-PP          | $K_i$ : 13 nM               | $K_i$ : 15 nM               | $K_i$ : 13 $\mu$ M                |
|                   | <b>95% CI</b> : 12 to 14 nM | <b>95% CI</b> : 14 to 16 nM | <b>95% CI</b> : 12 to 16 $\mu$ M  |
| rRgpB-PP          | $K_i$ : 22 nM               | $K_i$ : 29 nM               | $K_i$ : 11 $\mu$ M                |
|                   | <b>95% CI</b> : 20 to 24 nM | <b>95% CI</b> : 26 to 32 nM | <b>95% CI</b> : 9.0 to 13 $\mu$ M |
| rKgp-PP           | No inhibition               | No inhibition               | $K_i$ : 38 $\mu$ M                |
|                   |                             |                             | <b>95% CI</b> : 36 to 39 $\mu$ M  |

**S12 Table:** The  $K_i$  of rRgpA-PP and rRgpB-PP against rRgpAH.

| <b>rRgpAH Inhibition Kinetics</b> |       |       |       |       |        |       |       |       |
|-----------------------------------|-------|-------|-------|-------|--------|-------|-------|-------|
| <b>BAPNA (mM)</b>                 | 0.20  | 0.40  | 0.60  | 0.80  | 1.0    | 1.2   | 1.4   | 1.6   |
| <b>rRgpA-PP</b>                   |       |       |       |       |        |       |       |       |
| <b><math>K_i</math> (nM)</b>      | 13    | 15    | 15    | 13    | 13     | 14    | 13    | 14    |
| <b>95% CI (nM)</b>                | 9-15  | 13-19 | 13-18 | 10-15 | 12 -14 | 11-19 | 11-14 | 13-15 |
| <b>rRgpB-PP</b>                   |       |       |       |       |        |       |       |       |
| <b><math>K_i</math> (nM)</b>      | 26    | 25    | 24    | 24    | 23     | 22    | 23    | 24    |
| <b>95% CI (nM)</b>                | 24-28 | 24-26 | 23-25 | 26-28 | 22-24  | 21-23 | 22-24 | 23-25 |

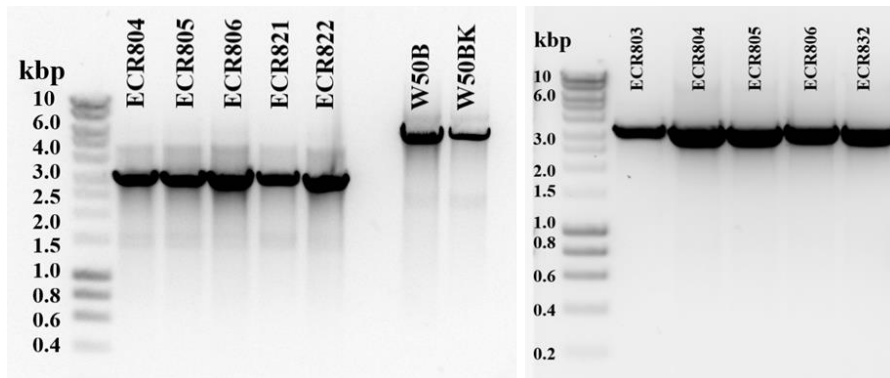

**S1 Fig:** PCR analysis of transformed *P. gingivalis* genomic DNAs.

pRgpArelease was transformed into *P. gingivalis* to give truncated *rgpA* genes, strain W50 (ECR803), W50B (ECR805), and W50BK (ECR806). ECR803 was transformed with *rgpB::tetQ* (ECR804). *P. gingivalis* W50B and W50BK were transformed with pRgpATH (ECR821 and ECR822 respectively). *P. gingivalis* W50B was transformed with pRgpAH (ECR832). W50B and W50BK are non-recombinant controls. PCR analysis using a reverse primer internal to *ermF* (R01) and flanking forward primer 5' to the genome recombination point (pgmAR1). Controls used pgmAR1 and RgpAhr3pR.

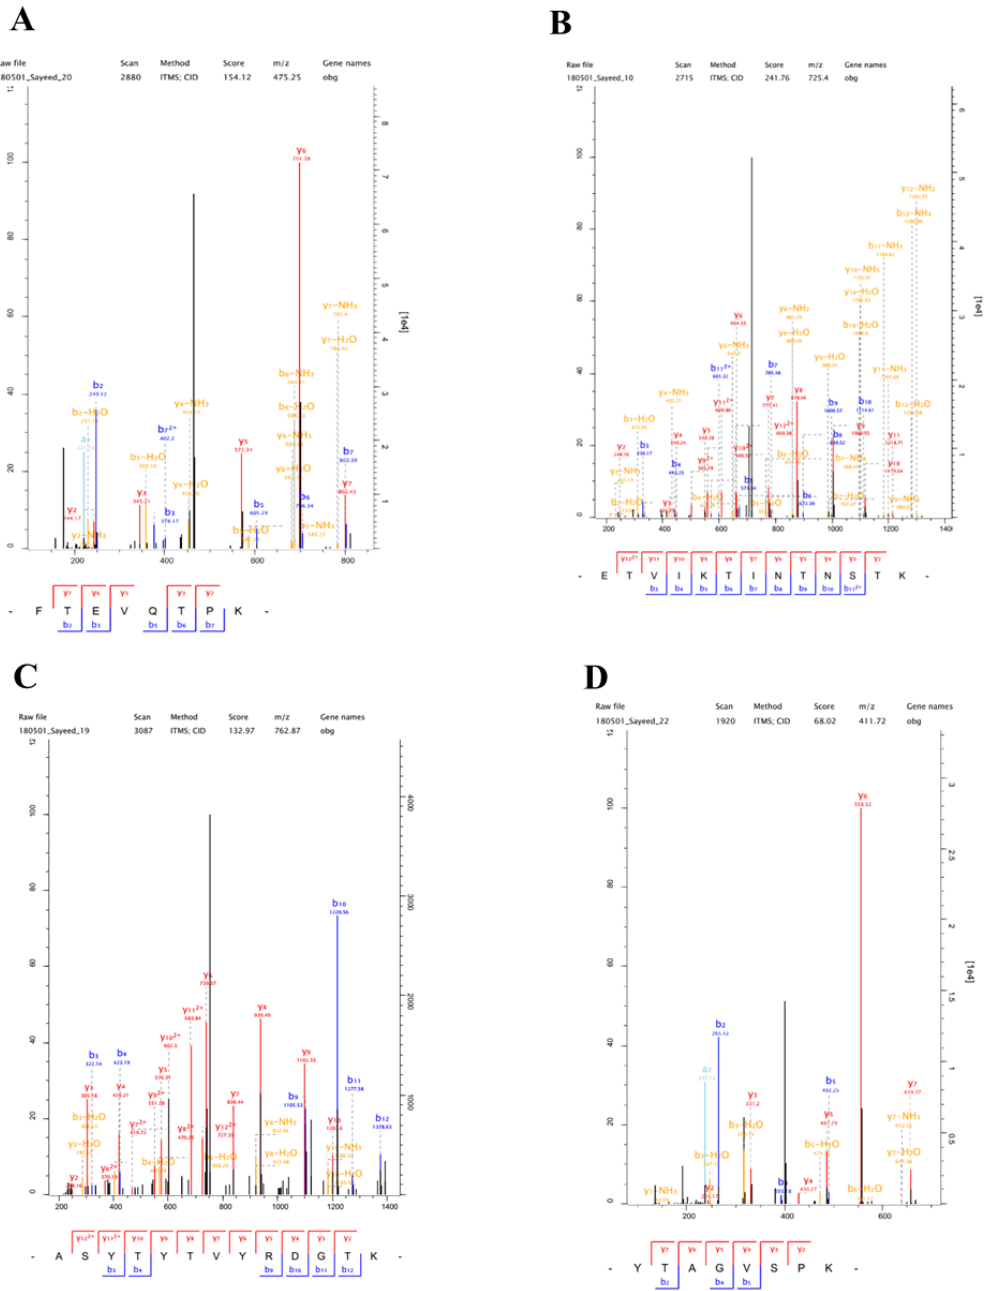

**S2 Fig:** LC-MS analysis of the rGpA secreted by ECR806.

(A) The most N-terminal peptide identified corresponds to the predicted rGpA N-terminus. (B) peptide at the proposed KK cleavage target site of rGpA. (C) peptide C-terminal to the proposed KK cleavage target site of rGpA. (D) peptide near the ABM2 C-terminus. Panel (D) indicates that rGpA did not release due to cleavage at the KK site, rather cleavage of rGpA occurs within KVCVDYIPDGVA at the polypeptide C-terminus.

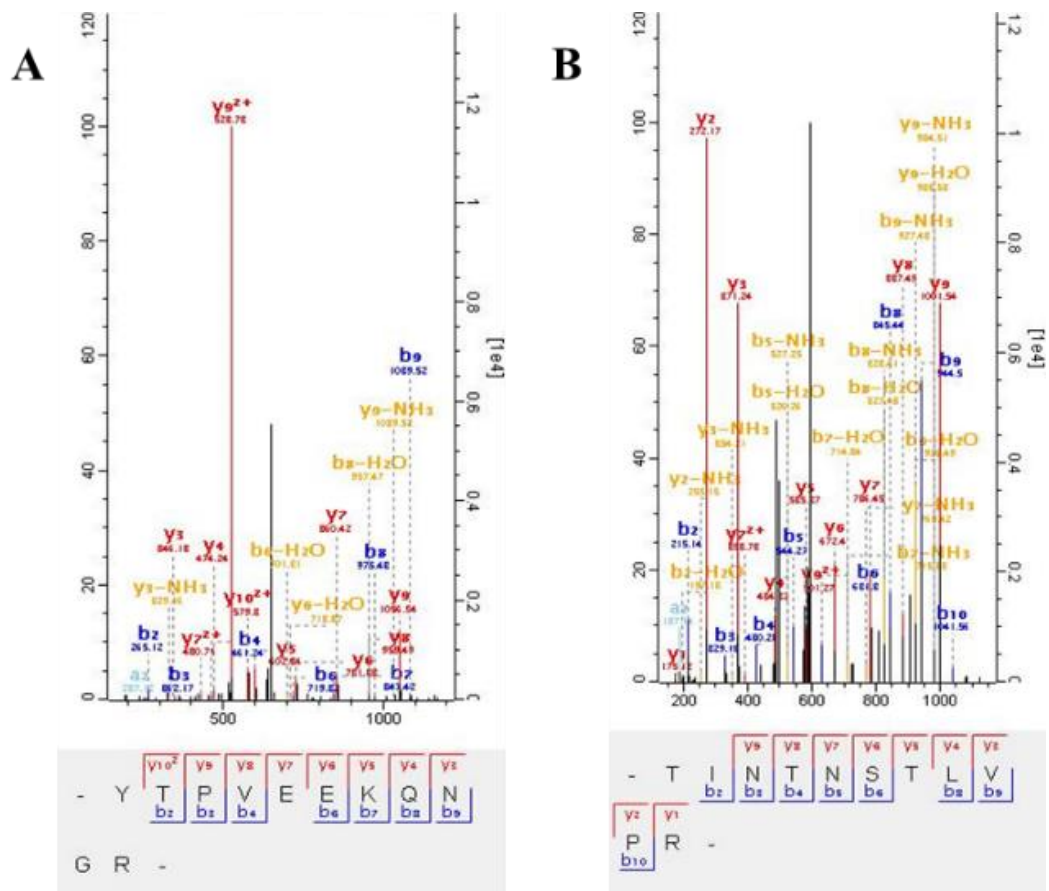

**S3 Fig:** The LC-MS analysis of trypsin digested peptides of rRgpATH in the ECR821 VFSN band j (Fig 2.). The mature rRgpATH N-terminus fragment was identified (A). The most C-terminal peptide identified was cleaved within the thrombin recognition site (B). No peptide with a His affinity tag was identified.



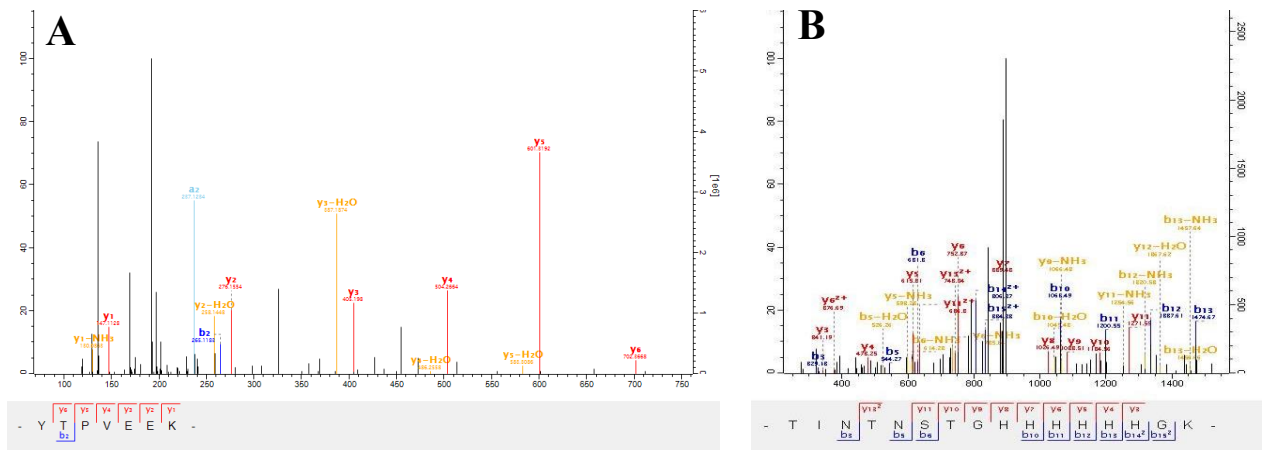

**S4 Fig:** The LC-MS analysis of tryptic digested rRgpAH peptides. N-terminal fragment (A) and the C-terminal fragment (B) confirming the presence of the His affinity tag and a Lys residue at the C-terminus.

**A**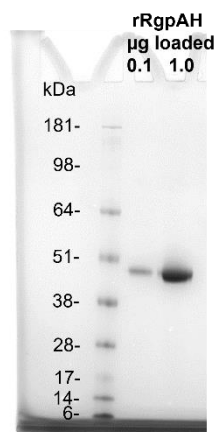**B**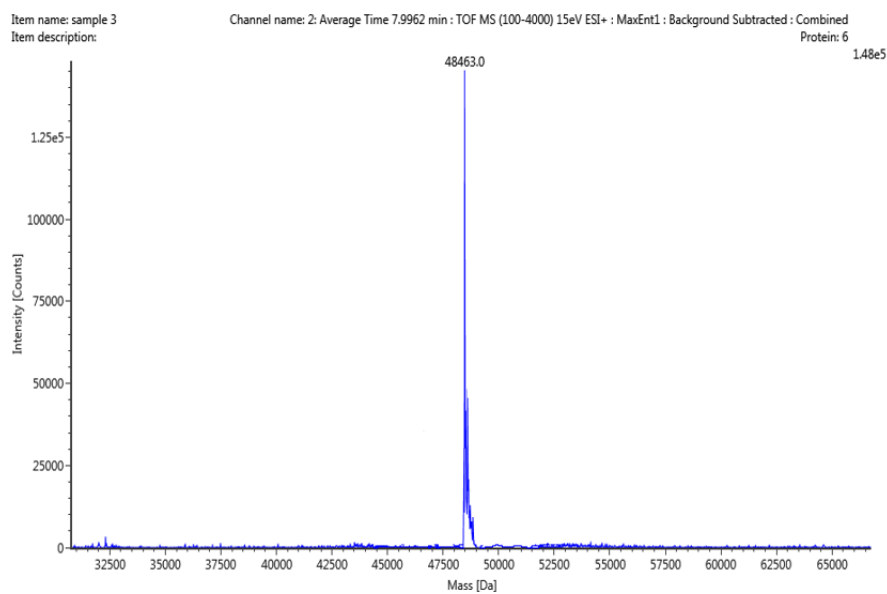

**S5 Fig:** SDS-PAGE and MS analysis of purified rRgpAH.

(A) Denaturing SDS-PAGE of purified rRgpAH. Lanes were loaded with 0.1 µg or 1.0 µg of rRgpA as indicated. The gel was a 4-12% Nu-PAGE gel run using MOPS running buffer. See Blue Plus molecular mass standards (Invitrogen) are indicated to the left (B) The deconvoluted mass spectrum of purified rRgpAH.

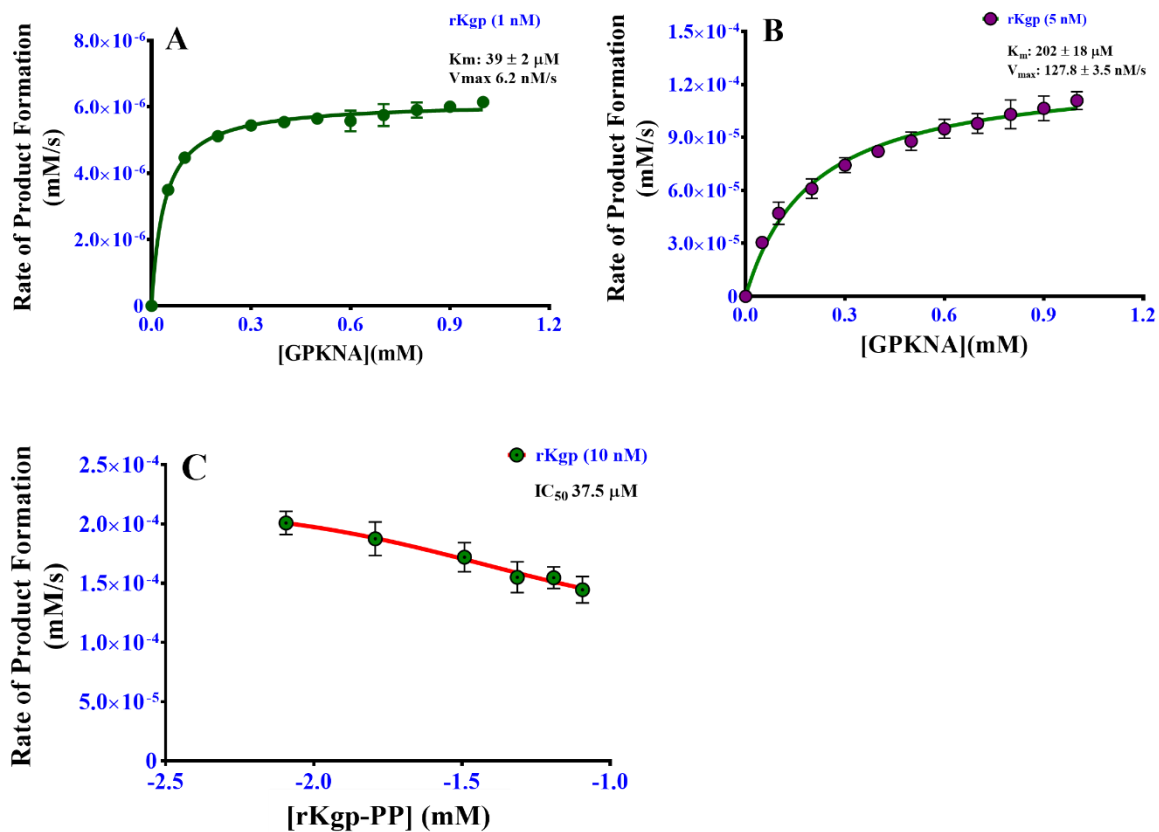

**S6 Fig:** The kinetics of rKgp using substrate GPKNA.

(A) The kinetics of rKgp with no glycylglycine as an assay reagent. (B) The kinetics of rKgp using 180 mM of glycylglycine as an assay additive. (C) Dose-dependent effect of rKgp-PP against purified Lys-gingipains rKgp. Reactions for (B) and (C) were carried out in a 200  $\mu\text{L}$  mixture of Tris 50 mM, NaCl 150 mM,  $\text{CaCl}_2$  5 mM, pH 8, 20 mM Cys, 180 mM glycylglycine, rKgp (5 nM for B, and 10 nM for C), varying concentrations of rKgp-PP, 1.0 mM GPKNA. Assay (A) was carried out by replacing glycylglycine with Milli Q water.

# Original gel and blot images

Figure 2: Panel (a)

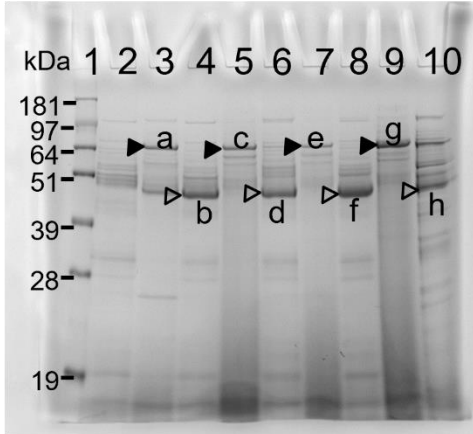

Figure 3: Panel (b)

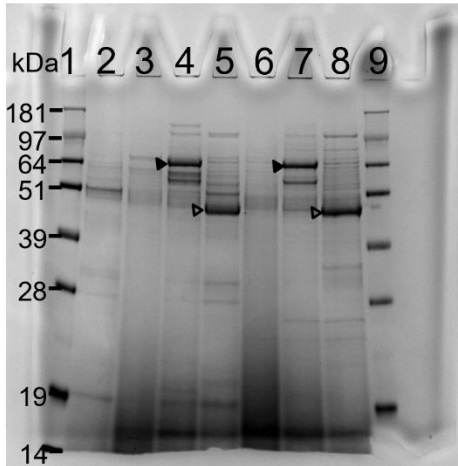

Figure 3: Panel (c)

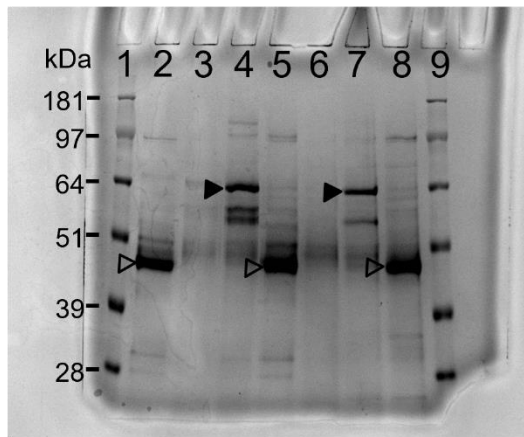

Figure 3: Panel d(i)

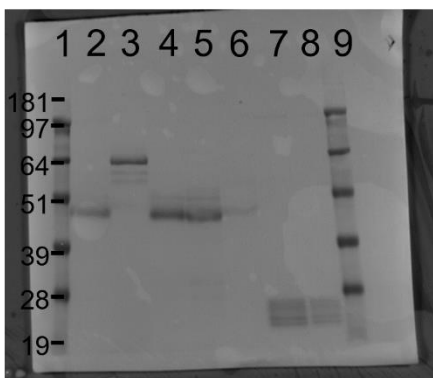

Figure 3: Panel d(ii)

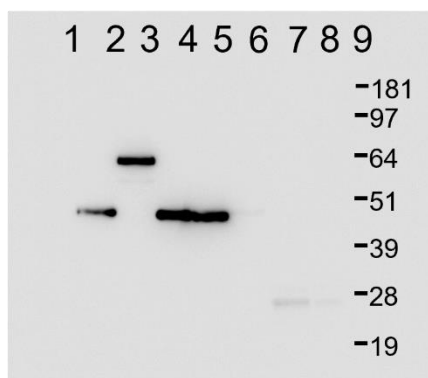

**S7 Fig:** Original gel and blot images
